# Supplementary material for: SiO2-Alginate-Based Gel Polymer Electrolytes for Zinc-Ion Batteries
Source: MDPI journal article supplement (doi:10.3390/batteries8100175), 2022-10-11
Supplement: s1 [file s1]

**Supporting Information**

**SiO<sub>2</sub>-Alginate-Based Gel Polymer Electrolytes for Zinc-Ions**

**Batteries**

Peishu Tian<sup>1</sup>, Xin Zhong<sup>1</sup>, Caiting Gu<sup>1</sup>, Zhe Wang<sup>2</sup> and Fengwei Shi<sup>1, 2\*</sup>

1 School of Chemical Engineering, Changchun University of Technology, Changchun

130012, PR China

2 Key Laboratory of Advanced Functional Polymer Membrane Materials of Jilin

Province, Changchun 130012, PR China

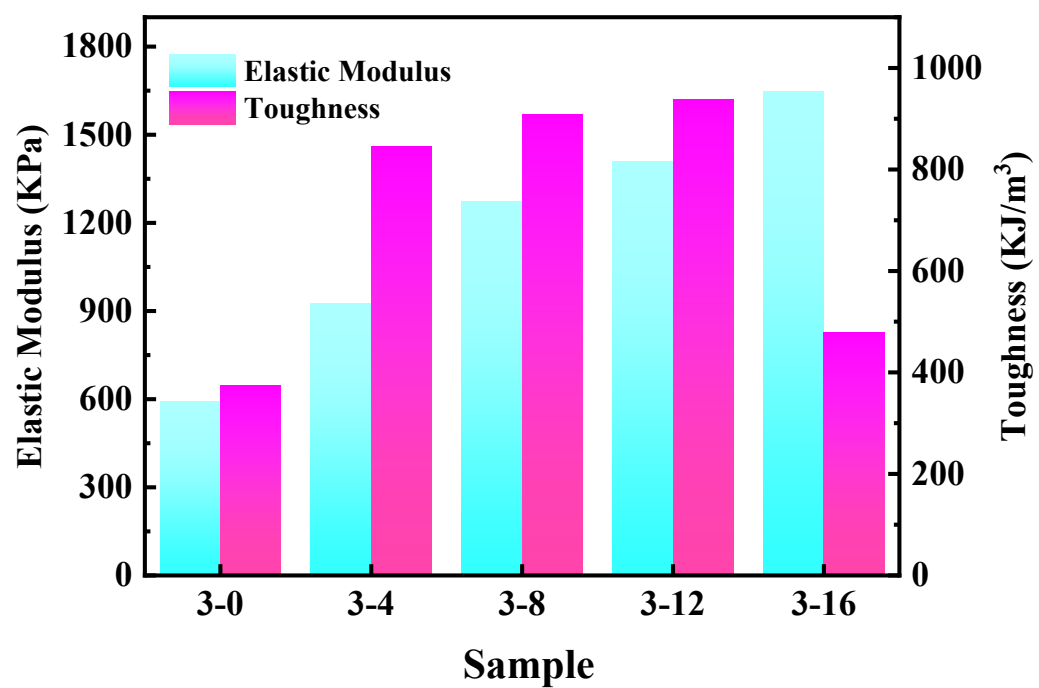

**Figure S1.** Elastic modulus and toughness of GPE hydrogel matrix.

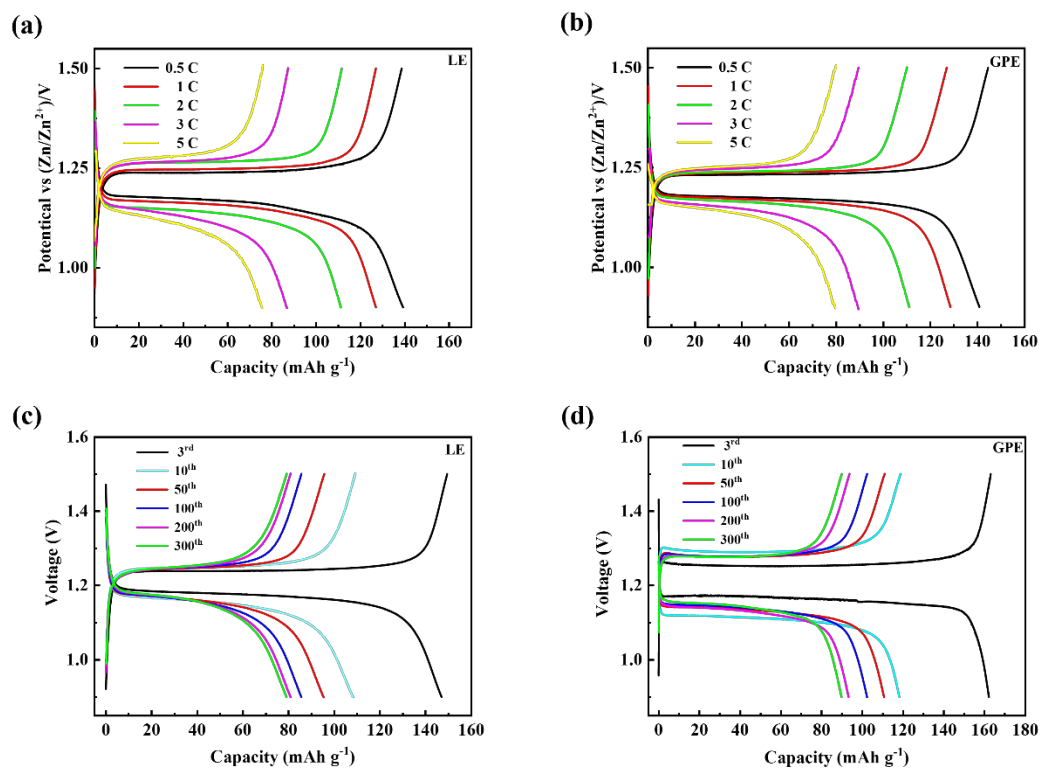

**Figure S2.** Charge/discharge profiles of (a) Zn/LE/LFP and (b) Zn/GPE/LFP, respectively. Charge/Discharge profiles of (c) Zn/LE/LFP and (d) Zn/GPE/LFP batteries at 3<sup>rd</sup>, 10<sup>th</sup>, 50<sup>th</sup>, 100<sup>th</sup>, 200<sup>th</sup> and 300<sup>th</sup> at the current density of 1 C; cut of voltage 0.9–1.5 V (vs. Zn/Zn<sup>2+</sup>).

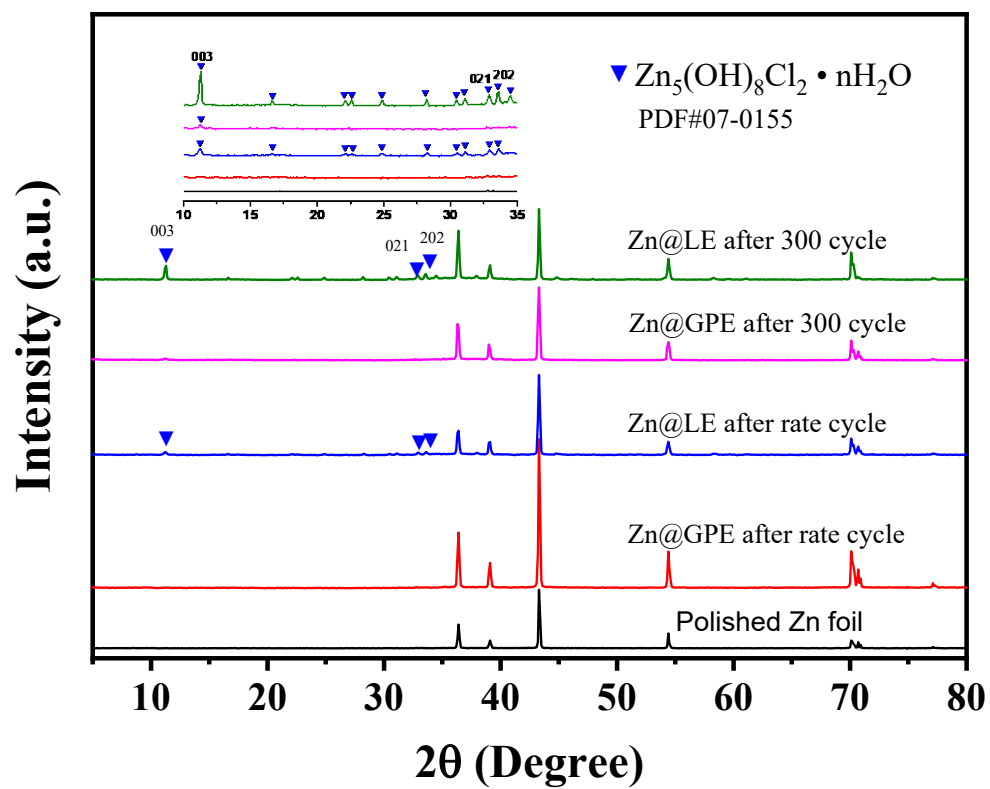

**Figure S3.** XRD patterns of the anodes of the Zn//LFP batteries after 300cycles at 1C.

**Table S1.** Comparison of the performance of zinc-ion polymer electrolytes

| gel polymer electrolyte  | Salts                                                   | Ionic conductivities (S cm <sup>-1</sup> ) | Ref.      |
|--------------------------|---------------------------------------------------------|--------------------------------------------|-----------|
| SiO <sub>2</sub> -SA GPE | 5M ZnCl <sub>2</sub> +4M LiCl                           | 1.14×10 <sup>-2</sup>                      | This work |
| PVA                      | 3M LiCl+2M ZnCl <sub>2</sub><br>+0.4M MnSO <sub>4</sub> | 0.897×10 <sup>-2</sup>                     | [46]      |
| Guar gum                 | 2M ZnSO <sub>4</sub> +0.1M MnSO <sub>4</sub>            | 1.07×10 <sup>-2</sup>                      | [47]      |
| PEO                      | ZnCl <sub>2</sub>                                       | 2~4×10 <sup>-3</sup>                       | [48]      |
| Poly-ε-caprolactone      | Zn(CF <sub>3</sub> SO <sub>3</sub> ) <sub>2</sub>       | 8.8×10 <sup>-4</sup>                       | [49]      |
